# Supplementary material for: Betaglycan sustains HGF/Met signaling in lung cancer and endothelial cells promoting cell migration and tumor growth
Source: PubMed Central journal article supplement — Heliyon. 2024 Apr 30;10(9):e30520. doi: 10.1016/j.heliyon.2024.e30520 (PMC11096750; doi:10.1016/j.heliyon.2024.e30520), 2024-04-30
Supplement: mmc1.pdf [file mmc1.pdf]

pAKT

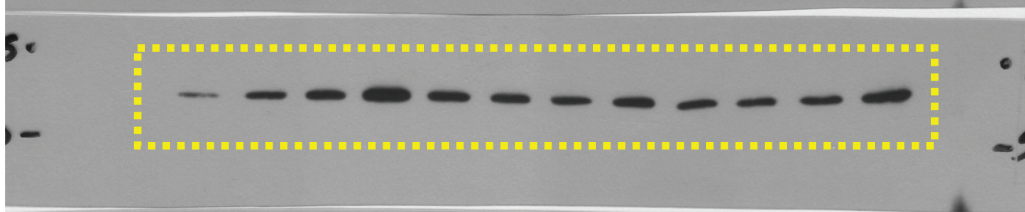

pERK

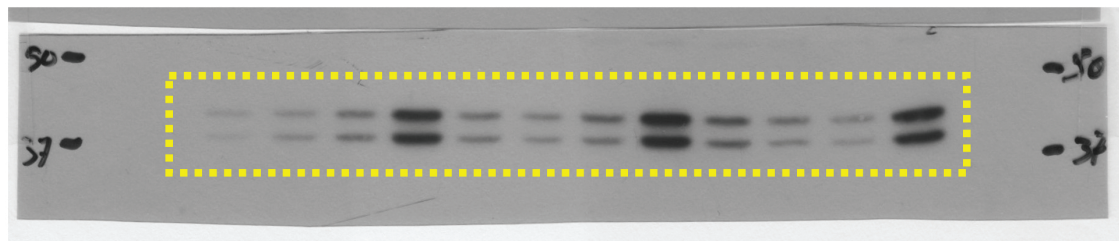

AKT1

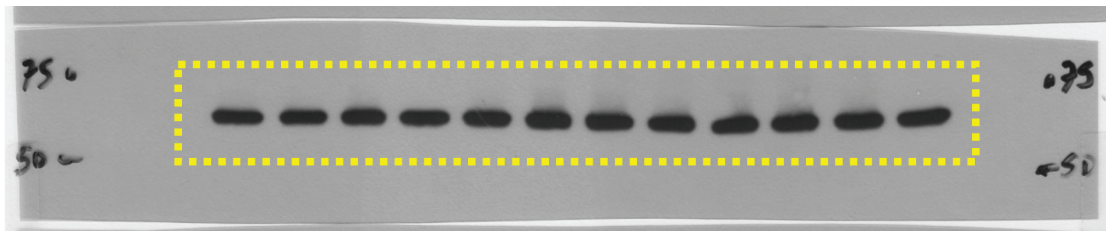

ERK2

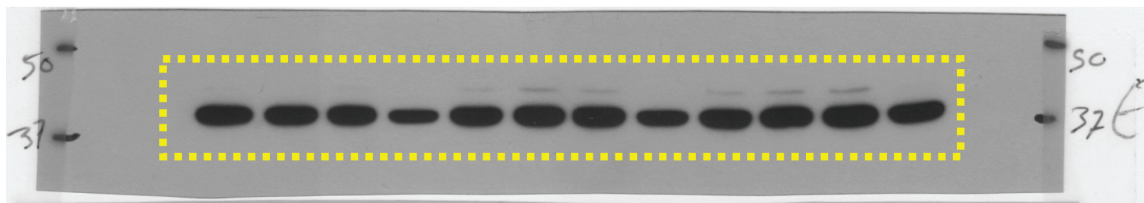

**Figure 1B.** Uncropped original western blots.

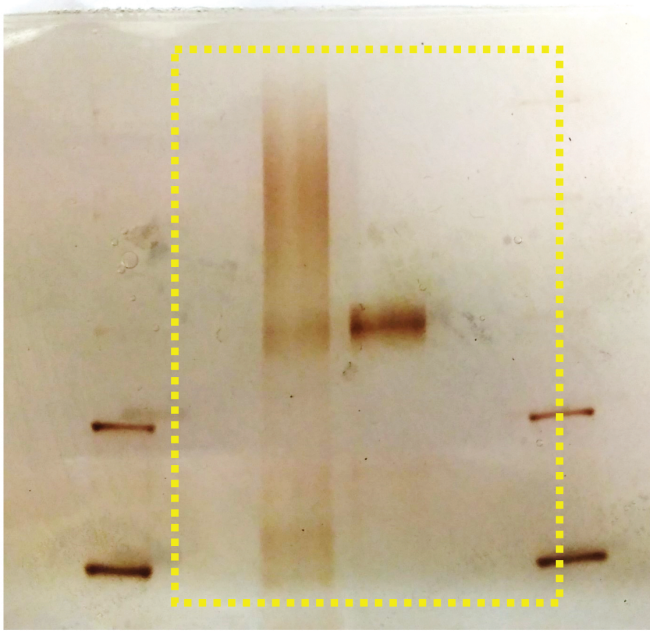

**Figure 3B.** Uncropped original silver stain.

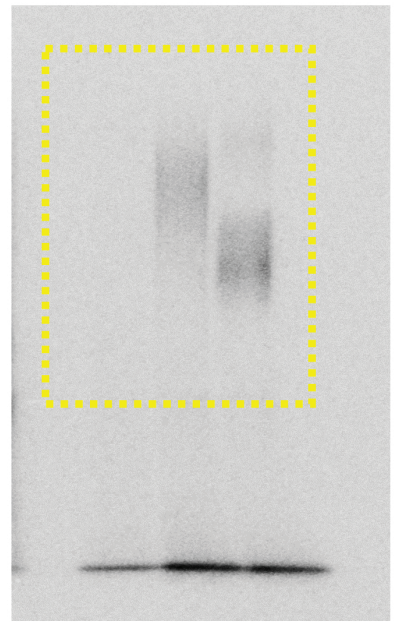

**Figure 3C.** Uncropped original autoradiography.

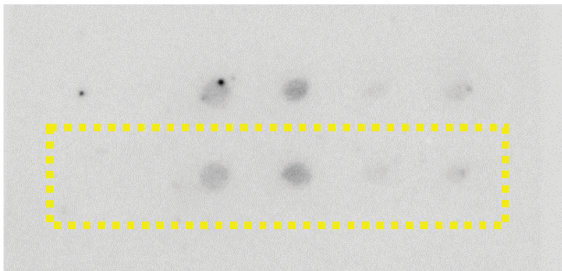

**Figure 3D.** Uncropped original overlay dot blot.

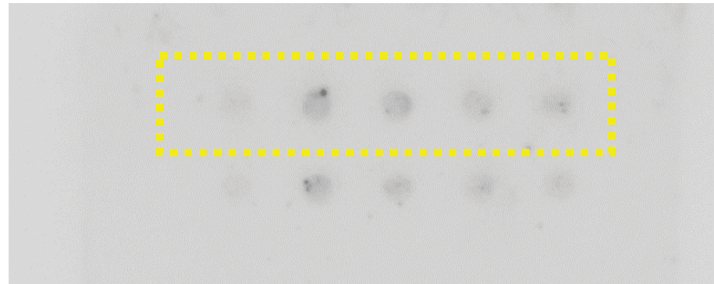

**Figure 3E.** Uncropped original overlay dot blot.

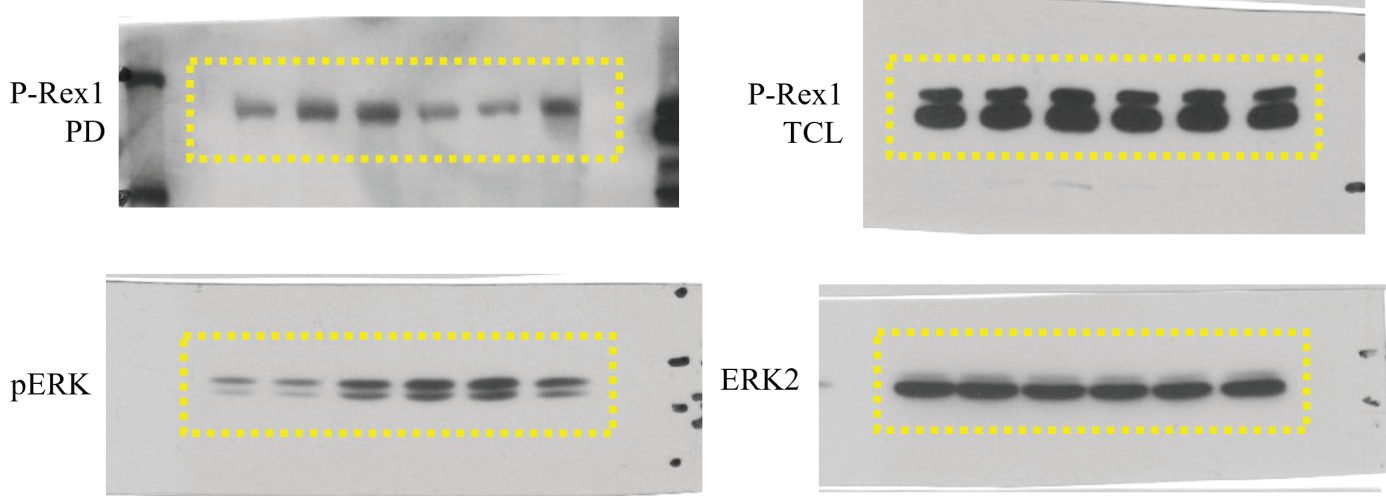

**Figure 4B.** Uncropped original western blots.

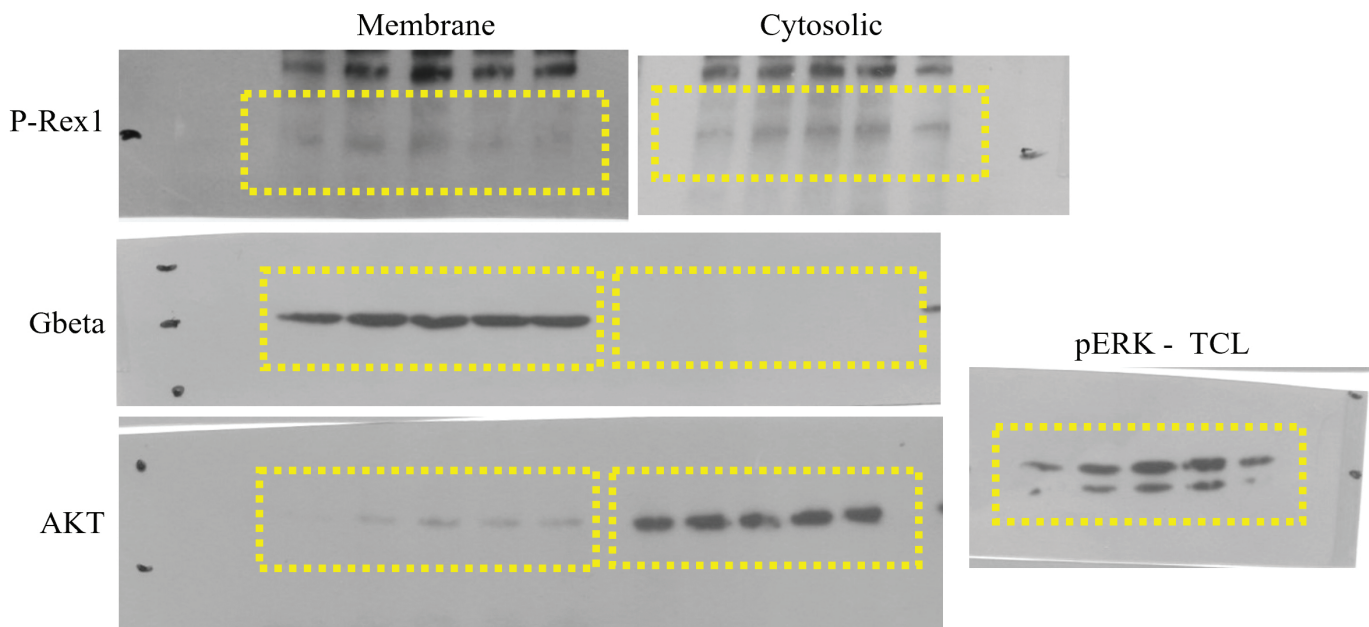

**Figure 4C.** Uncropped original western blots.

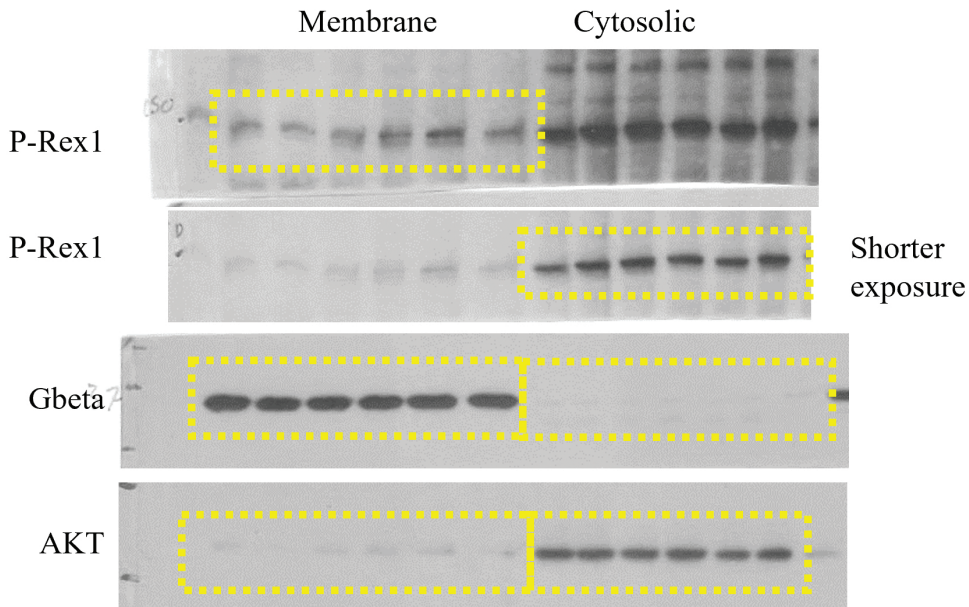

**Figure 4D.** Uncropped original western blots.

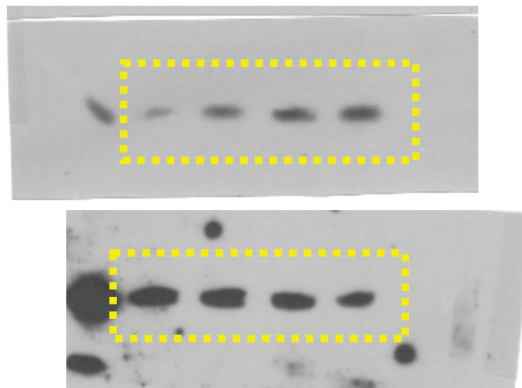

**Figure 4E.** Uncropped original western blots.

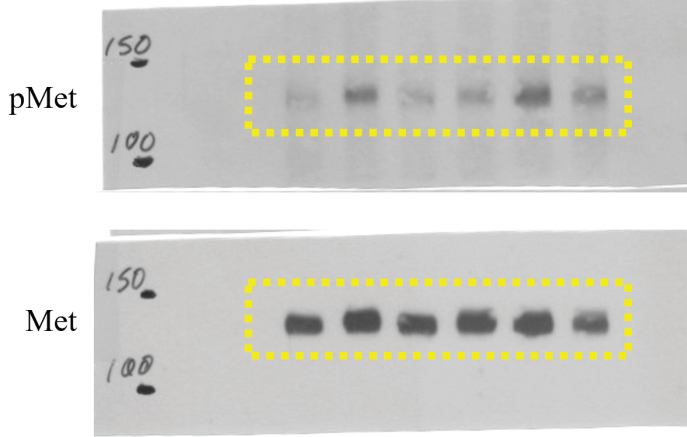

**Figure 5A.** Uncropped original western blots.

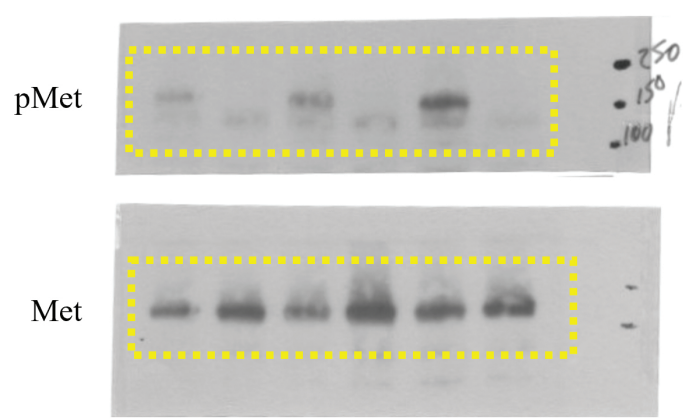

**Figure 5B.** Uncropped original western blots.

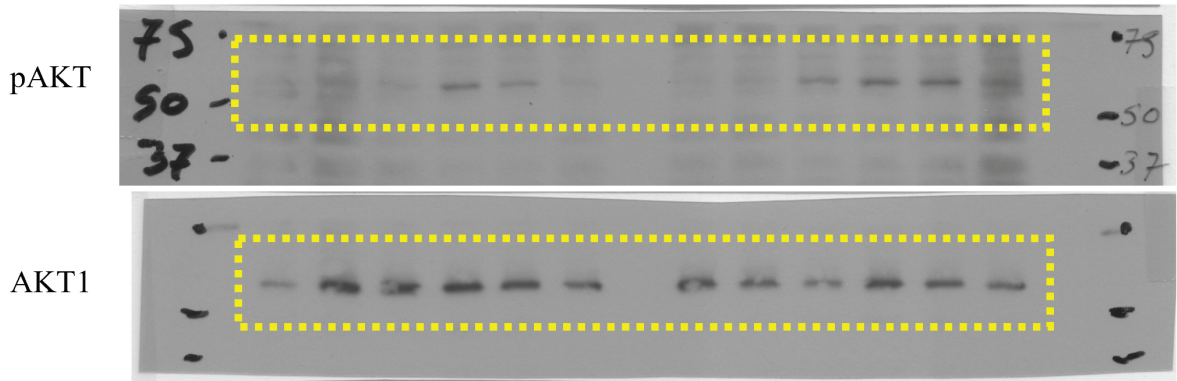

**Figure 5C.** Uncropped original western blots.

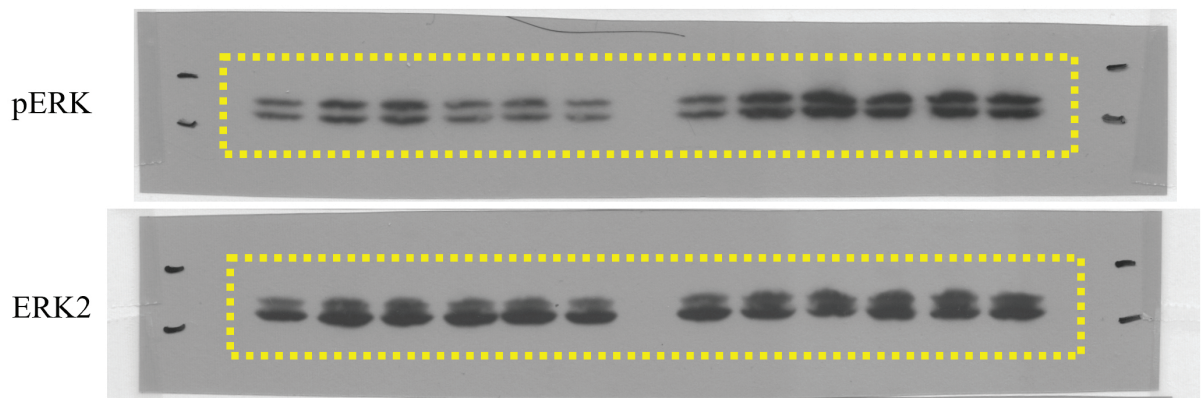

**Figure 5D.** Uncropped original western blots.
